# Supplementary material for: Addition of ethynylferrocene to transition-metal complexes containing a chelating 1,2-dicarba-closo-dodecaborane-1,2-dichalcogenolate ligand—in vitro cooperativity of a ruthenium compound on cellular uptake of an anticancer drug
Source: Royal Society of Chemistry journal article supplement (doi:10.1039/b810831e), 2008-11-11
Supplement: b810831e.pdf [file b810831e.pdf]

## Supporting Information for

### Addition of ethynylferrocene to transition-metal complexes containing a chelating 1,2-dicarba-*closo*-dodecaborane-1,2-dichalcogenolate ligand---in vitro cooperativity of a ruthenium compound on cellular uptake of an anticancer drug

De-Hong Wu<sup>a,†</sup>, Chun-Hui Wu<sup>b,†</sup>, Yi-Zhi Li<sup>a</sup>, Da-Dong Guo<sup>b</sup>, Xue-Mei Wang<sup>b\*</sup>, Hong Yan<sup>a\*</sup>

<sup>a</sup> State Key Lab of Coordination Chemistry, School of Chemistry and Chemical Engineering, <sup>b</sup> State Key Lab of Bioelectronics (Chien-Shiung Wu Lab), Southeast University, Nanjing, Jiangsu 210096, China.

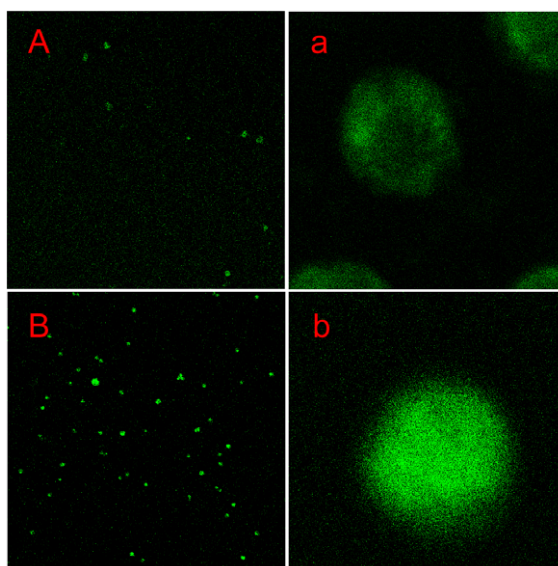

**Figure S1:** Confocal fluorescence microscopy of the drug-sensitive leukemia K562 cells incubated with daunorubicin (130  $\mu\text{M}$ ) in the absence (A, a) and presence (B, b) of **4S** (14  $\mu\text{M}$ ); (A) and (B) show the panoramic images of the target cells; (a) and (b) illustrate the typical single cell images from (A) and (B), respectively. All images were obtained after incubating the leukemia K562 cells for 15

minutes. A, B, scale:  $1000 \times 1000 \mu\text{m}$ ; a, b, scale:  $31.25 \times 31.25 \mu\text{m}$ .

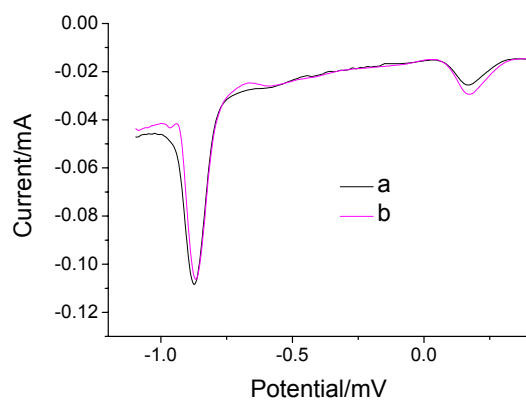

**Figure S2:** Differential pulse voltammetry (DPV) study of daurorubicin ( $130\mu\text{M}$ ) (a) in the absence and (b) presence of **4S** ( $14 \mu\text{M}$ )
